# Supplementary material for: NECAPs are negative regulators of the AP2 clathrin adaptor complex
Source: eLife journal article supplement (doi:10.7554/elife.32242), 2018-01-18
Supplement: supp [file elife-32242-supp-v1.zip]

Archive with 4 entries (4 files):
- elife_poa_e32242_Supplementary_File_1.docx
- elife_poa_e32242_Figure_6_figure_supplement_1.ai
- elife_poa_e32242_Figure_1_figure_supplement_1.ai
- elife_poa_e32242_Transparent_Reporting_File.pdf
